# Supplementary material for: Clinical assessment is a neglected component of outbreak preparedness: evidence from refugee camps in Greece
Source: PubMed Central journal article supplement (PMC5858141; doi:10.1186/s12916-018-1015-9), 2018-03-19
Supplement: 12916_2018_1015_MOESM2_ESM.pdf [file 12916_2018_1015_MOESM2_ESM.pdf]

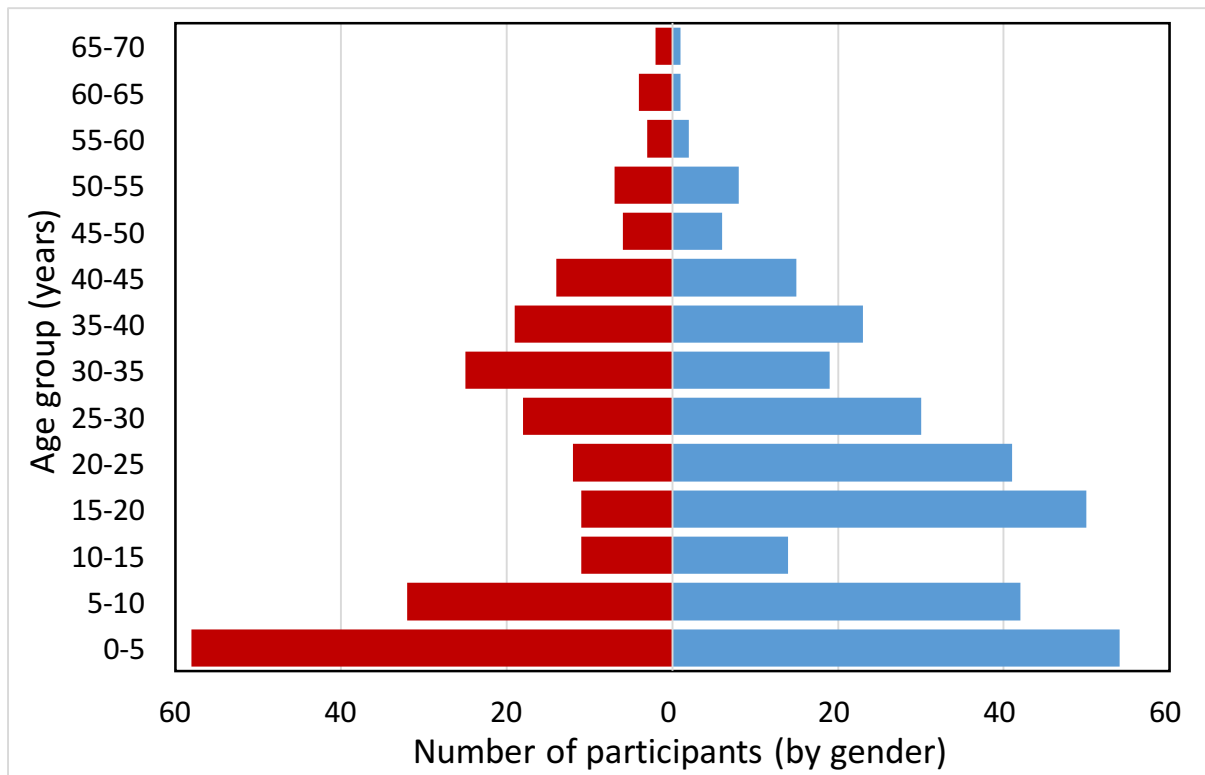

Figure s2: Age and gender of included participants. Blue describes male patients, and red describes female patients.
